# Supplementary material for: The impact of the management strategies for patients with subclinical hypothyroidism on long-term clinical outcomes: An umbrella review
Source: PubMed Central journal article supplement (PMC9119548; doi:10.1371/journal.pone.0268070), 2022-05-19
Supplement: pone.0268070.s001.pdf [file pone.0268070.s001.pdf]

## Additional File 1. MEDLINE Search Strategy

Database: Ovid MEDLINE(R) and Epub Ahead of Print, In-Process & Other Non-Indexed Citations, Daily and Versions(R) <1946 to February 17, 2021>

Search Strategy:

---

- 1 exp Hypothyroidism/ (33056)
- 2 exp Thyroid Diseases/ (149791)
- 3 hypothyroid\*.tw. (35912)
- 4 (thyroid? adj3 deficien\*).tw. (1536)
- 5 (thyroid? adj3 insufficien\*).tw. (488)
- 6 (thyroid? adj3 failure?).tw. (549)
- 7 (thyroid? adj3 low adj3 product\*).tw. (7)
- 8 (thyroid? adj3 under adj3 product\*).tw. (4)
- 9 (thyroid? adj3 underactiv\*).tw. (27)
- 10 (thyroid? adj3 hypofunction).tw. (265)
- 11 (thyroid? adj3 d?sfuction).tw. (5642)
- 12 or/1-11 (162773)
- 13 (mild\* or sub-clinic\* or subclinic\*).tw. (453666)
- 14 12 and 13 (8752)
- 15 (tsh adj3 (elevat\* or increas\* or high\*)).tw. (6791)
- 16 (SHT or SCH).tw. (8664)
- 17 14 or 15 or 16 (22418)
- 18 exp Hormone Replacement Therapy/ (25185)
- 19 (thyroid? adj3 (therap\* or treat\*)).tw. (12185)
- 20 exp Thyroxine/ (48783)
- 21 (thyroxin\* or levothyrox\* or levo-thyrox\* or l-thyrox\* or L-T4 or LT4).tw. (34600)
- 22 or/18-21 (94909)
- 23 (follow?up or monitor\* or observ\* or surveil\*).tw. (4488288)
- 24 ((no or lack\*) adj2 (treatment\* or therap\* or intervention\*)).tw. (137605)
- 25 (untreated or ('not' adj2 treat\*)).tw. (264180)
- 26 or/23-25 (4777064)
- 27 exp Cardiovascular diseases/ or exp Heart diseases/ or exp Myocardial ischemia/ or exp Vascular diseases/ or exp Arteriosclerosis/ (2435564)
- 28 Carotid Intima Media Thickness/ or Intima-Media Thickness, Carotid/ or Atherosclerosis/ or Atheroscleroses/ or Atherogenesis/ (41075)

29 ((cardiovasc\* or vasc\* or cardio\* or cardia\* or heart\* or coronary\* or myocard\* or pericard\* or isch\$em\*) adj2 (disease? or event? or arrest? or fail\* or mortality)).tw. (745362)

30 (lipid\$ or cholesterol or TC or triglyceride\$ or LDL or HDL).tw. (756725)

31 (myocardi\* adj (infarct\* or revascular\* or re-vascular\* or isch\$emi\*)).tw. (225198)

32 (heart attack\* or angina).tw. (58869)

33 (morbid\* adj5 (cardio\* or cardia\* or heart\* or coronary\* or myocard\* or pericard\* or isch\$em\*)).tw. (25873)

34 peripheral arter\* disease\*.tw. (14503)

35 (emboli\* or arrhythmi\* or thrombo\* or atrial fibrillat\* or atrial flutter\* or tachycardi\* or endocardi\* or (sick adj sinus)).tw. (690392)

36 (flow-mediated vasodilat\* or flow-mediated dilat\* or endothelial-dependent vasodilat\* or endothelial-dependent dilat\* or endothelial function\$ or carotid intima-media thickness or intima-media thickness or carotid-wall thickness or carotid atherosclerosis or C-IMT).tw. (35362)

37 (isch\$emi\* adj2 (vascular or heart)).tw. (34721)

38 or/27-37 (3563857)

39 exp Quality of Life/ (204526)

40 quality of life.tw. (295840)

41 (QoL or HRQoL).tw. (56831)

42 or/39-41 (359236)

43 exp Stroke/ (140280)

44 exp Ischemic Attack, Transient/ (20638)

45 (stroke\$ or apoplexy).tw. (263191)

46 ((cerebrovasc\* or cerebral vascular or brain) adj2 (disease? or event? or arrest? or fail\* or mortality or accident\* or death\*)).tw. (62563)

47 ((brain\* or cerebral or lacunar) adj2 infarct\*).tw. (27518)

48 (isch\$emi\* adj2 (transient or attack\* or cerebral or brain)).tw. (57232)

49 or/43-48 (387778)

50 exp Frailty/ (3592)

51 frail\*.tw. (24209)

52 exp Fractures, Bone/ or fracture\$.tw. (310642)

53 (50 or 51) and 52 (1293)

54 (mortality or death\*).tw. (1479781)

55 Meta-Analysis as Topic/ (19028)

56 meta analy\$.tw. (194305)

57 metaanaly\$.tw. (2211)

58 Meta-Analysis/ (126788)

59 (systematic adj (review\$1 or overview\$1)).tw. (197114)  
60 exp Review Literature as Topic/ (15372)  
61 or/55-60 (335876)  
62 cochrane.ab. (94602)  
63 embase.ab. (105156)  
64 (psychlit or psyclit).ab. (915)  
65 (psychinfo or psycinfo).ab. (40574)  
66 (cinahl or cinhal).ab. (32163)  
67 science citation index.ab. (3252)  
68 bids.ab. (563)  
69 cancerlit.ab. (633)  
70 or/62-69 (170652)  
71 reference list\$.ab. (19037)  
72 bibliograph\$.ab. (19191)  
73 hand-search\$.ab. (7333)  
74 relevant journals.ab. (1216)  
75 manual search\$.ab. (4784)  
76 or/71-75 (46231)  
77 selection criteria.ab. (31649)  
78 data extraction.ab. (23699)  
79 77 or 78 (52968)  
80 Review/ (2767148)  
81 79 and 80 (29899)  
82 Comment/ (894822)  
83 Letter/ (1124632)  
84 Editorial/ (558685)  
85 animal/ (6756006)  
86 human/ (19036693)  
87 85 not (85 and 86) (4755937)  
88 or/82-84,87 (6623165)  
89 61 or 70 or 76 or 81 (402770)  
90 89 not 88 (382792)  
91 17 and (22 or 26) and (38 or 42 or 49 or 53 or 54) (2382)  
92 90 and 91 (96)
